# Supplementary material
Source: Springer Nature journal article supplement (https://www.springermedizin.de/resource/supplementary/13046_2009_194_MOESM2_ESM.pdf/9661516)
Supplement: MOESM2 [file 9661516]

**Table 2. The up-regulated DEGs sharing from cirrhosis to metastasis sorted out by the following GO function.**

| Gene symbol | Gene name                                                             | GO      |
|-------------|-----------------------------------------------------------------------|---------|
| CTGF        | connective tissue growth factor                                       | 1-6     |
| TNFRSF12A   | tumor necrosis factor receptor superfamily, member 12a                | 1-5     |
| PDGFRB      | platelet derived growth factor receptor, beta polypeptide             | 1,5     |
| RHOB        | ras homolog gene family, member B                                     | 1-3     |
| THBS1       | Thrombospondin 1                                                      | 1,3,6   |
| RTN4        | reticulon 4                                                           | 1-3     |
| ANXA2       | annexin A2                                                            | 1,6     |
| ARHGAP24    | Rho GTPase activating protein 24                                      | 1       |
| APP         | amyloid beta (A4) precursor protein                                   | 2,3,5,6 |
| CD44        | CD44 antigen                                                          | 2,3,5,6 |
| COL1A1      | procollagen, type 1, alpha 1                                          | 2,3,5,6 |
| EDNRB       | endothelin receptor type B                                            | 2-6     |
| GJA1        | gap junction membrane channel protein alpha 1                         | 2-5     |
| LAMC1       | laminin, gamma 1                                                      | 3,5,6   |
| PPP2CA      | protein phosphatase 2 (formerly 2A), catalytic subunit, alpha isoform | 2,3,5   |
| SPP1        | secreted phosphoprotein 1                                             | 2,3,5,6 |
| LOC500040   | similar to Testis derived transcript                                  | 3-5     |
| FATH        | fat tumor suppressor homolog                                          | 3,5     |

---

|         |                                                    |     |
|---------|----------------------------------------------------|-----|
| GPNMB   | glycoprotein (transmembrane) nmb                   | 3,5 |
| CCNA2   | cyclin A2                                          | 3,5 |
| CD36    | cd36 antigen                                       | 3   |
| CD24    | CD24 antigen                                       | 3   |
| CXADR   | coxsackie virus and adenovirus receptor            | 3   |
| DDR1    | discoidin domain receptor family, member 1         | 3   |
| DCN     | decorin                                            | 3,6 |
| DPYSL2  | dihydropyrimidinase-like 2                         | 3   |
| ENPP1   | ectonucleotide pyrophosphatase/phosphodiesterase 1 | 3   |
| EPDR2   | ependymin related protein 2 (zebrafish)            | 3   |
| LGALS2  | lectin, galactoside-binding, soluble 2             | 3   |
| SPINT1  | serine peptidase inhibitor, Kunitz type 1          | 3   |
| TACSTD1 | tumor-associated calcium signal transducer 1       | 3   |
| TM4SF3  | transmembrane 4 superfamily member 3               | 3   |
| TMSB10  | thymosin, beta 10                                  | 3   |
| ITGA6   | integrin, alpha 6                                  | 2,3 |
| SDCBP   | syndecan binding protein                           | 3,4 |
| TNS     | tensin                                             | 3,4 |
| CFL1    | cofilin 1, non-muscle                              | 2,4 |
| MGP     | matrix Gla protein                                 | 3,6 |
| NID1    | Nidogen 1                                          | 3,6 |
| VIL2    | villin 2                                           | 3   |

---

---

|        |                                                         |     |
|--------|---------------------------------------------------------|-----|
| TSPAN3 | tetraspanin 3                                           | 3,5 |
| IGFBP3 | insulin-like growth factor binding protein 3            | 2,5 |
| EGR1   | early growth response 1                                 | 2,5 |
| EGLN3  | EGL nine homolog 3 (C. elegans)                         | 2,5 |
| GAS6   | growth arrest specific 6                                | 2,5 |
| MYC    | myelocytomatosis viral oncogene homolog (avian)         | 2,5 |
| MTAP2  | microtubule-associated protein 2                        | 2,5 |
| NME1   | expressed in non-metastatic cells 1                     | 2,5 |
| ANXA5  | annexin A5                                              | 2   |
| BZRP   | benzodiazepine receptor, peripheral                     | 2   |
| CD74   | CD74 antigen                                            | 2,5 |
| BEX1   | brain expressed X-linked 1                              | 2,5 |
| TRIB3  | tribbles homolog 3 (Drosophila)                         | 2   |
| CRYAB  | crystallin, alpha B                                     | 2   |
| LITAF  | LPS-induced TN factor                                   | 2   |
| DDIT4  | DNA-damage-inducible transcript 4                       | 2   |
| FCGR3  | Fc receptor, IgG, low affinity III                      | 2   |
| G6PDX  | glucose-6-phosphate dehydrogenase X-linked              | 2   |
| GCLC   | glutamate-cysteine ligase, catalytic subunit            | 2   |
| GGT1   | gamma-glutamyltransferase 1                             | 2   |
| HSPCB  | heat shock 90kDa protein 1, beta                        | 2   |
| ABCB1A | ATP-binding cassette, sub-family B (MDR/TAP), member 1A | 2   |

---

---

|         |                                                              |     |
|---------|--------------------------------------------------------------|-----|
| AKR1B4  | aldo-keto reductase family 1, member B4                      | 2   |
| AQP1    | aquaporin 1                                                  | 2   |
| BTG2    | B-cell translocation gene 2, anti-proliferative              | 2   |
| NQO1    | NAD(P)H dehydrogenase, quinone 1                             | 2   |
| NEK6    | NIMA (never in mitosis gene a)-related expressed kinase 6    | 2   |
| NGFRAP1 | nerve growth factor receptor (TNFRSF16) associated protein 1 | 2   |
| NOL3    | nucleolar protein 3 (apoptosis repressor with CARD domain)   | 2   |
| YWHAQ   | tyrosine 3-monooxygenase                                     | 2   |
| PRNP    | prion protein                                                | 2   |
| SLC25A4 | solute carrier family 25                                     | 2   |
| TFRC    | transferrin receptor                                         | 2   |
| VIM     | vimentin                                                     | 2   |
| TUBA1   | tubulin, alpha 1                                             | 2,5 |
| LGALS3  | lectin, galactose binding, soluble 3                         | 2,6 |
| IGFBP7  | insulin-like growth factor binding protein 7                 | 5   |
| CCND1   | cyclin D1                                                    | 5   |
| S100A6  | S100 calcium binding protein A6                              | 5   |
| SPARC   | secreted acidic cysteine rich glycoprotein                   | 5,6 |
| DMBT1   | deleted in malignant brain tumors 1                          | 5,6 |
| HSPCA   | heat shock protein 1, alpha                                  | 5   |
| EMP1    | epithelial membrane protein 1                                | 5   |
| DAB2    | disabled homolog 2 (Drosophila)                              | 5   |

---

---

|         |                                                             |   |
|---------|-------------------------------------------------------------|---|
| ANXA1   | annexin A1                                                  | 5 |
| ANXA7   | annexin A7                                                  | 5 |
| ATPIF1  | ATPase inhibitory factor 1                                  | 5 |
| S100A11 | S100 calcium binding protein A11                            | 5 |
| CD276   | CD276 antigen                                               | 5 |
| TAX1BP3 | Tax1 (human T-cell leukemia virus type I) binding protein 3 | 5 |
| TXNRD1  | thioredoxin reductase 1                                     | 5 |
| NPDC1   | neural proliferation, differentiation and control, 1        | 5 |
| PKIB    | protein kinase inhibitor beta, cAMP dependent, catalytic    | 5 |
| COL1A2  | procollagen, type I, alpha 2                                | 6 |
| COL3A1  | procollagen, type III, alpha 1                              | 6 |
| COL4A1  | procollagen, type IV, alpha 1                               | 6 |
| COL5A2  | procollagen, type V, alpha 2                                | 6 |
| ACP5    | acid phosphatase 5, tartrate resistant                      | 6 |
| LTBP1   | latent transforming growth factor beta binding protein 1    | 6 |
| DEFB1   | defensin beta 1                                             | 6 |

---

NOTE: The numbers from 1-6 indicate GO terms: angiogenesis, apoptosis, cell adhesion, cell migration, cell proliferation and extracellular matrix, respectively.
